# Supplementary material for: Copper promoted radical addition/cyclization of azobisisobutyronitrile with arylacrylamides: a convenient process to synthesize 3-(2′-cyano alkyl) oxindoles
Source: Royal Society of Chemistry journal article supplement (doi:10.1039/c5ra07739g), 2015-01-01
Supplement: c5ra07739g1.pdf [file c5ra07739g1.pdf]

# Copper Promoted radical addition/cyclization of Azobisisobutyronitrile with Arylacrylamides: a Convenient Process to Synthesize 3- (2'-cyano Alkyl) Oxindoles

Ruihong Wang and Weiliang Bao\*

Department of Chemistry, Zhejiang University (Xixi Campus), Hangzhou 310028,

People's Republic of China

Phone/fax: (+86)-571-8827-3814

E-mail: [wlbao@zju.edu.cn](mailto:wlbao@zju.edu.cn)

## Supporting Information

### Table of Contents

|                                                         |     |
|---------------------------------------------------------|-----|
| General Remarks.....                                    | S1  |
| Experimental Procedure.....                             | S2  |
| Characterization data for all compounds.....            | S2  |
| Copies of <sup>1</sup> H , <sup>13</sup> C Spectra..... | S7  |
| Copies of GC-MS Spectra.....                            | S26 |

### General Remarks.

All reagents and solvents were pure analytical grade materials purchased from commercial sources and were used without further purification, if not stated otherwise. All reactions were carried out in a Schlenk tube equipped with a magnetic stir bar. Merck 60 silica gel was used for chromatography, and Whatman silica gel plates with fluorescence F254 were used for thin-layer chromatography (TLC) analysis. All products were confirmed by <sup>1</sup>H NMR, <sup>13</sup>C NMR and HRMS. <sup>1</sup>H NMR and <sup>13</sup>C NMR

spectra were recorded on Bruker Avance 400, and tetramethylsilane (TMS) or CDCl<sub>3</sub> (7.26 ppm for <sup>1</sup>H NMR, 77.0 ppm for <sup>13</sup>C NMR) was used as a reference. Data for <sup>1</sup>H were reported as follows: chemical shift (ppm), and multiplicity (s = singlet, d = doublet, t = triplet, q = quartet, m = multiplet). Data for <sup>13</sup>C NMR were reported as ppm. High resolution mass spectra (HRMS) were performed on a Waters Micromass GCT instrument.

### Experimental Procedure

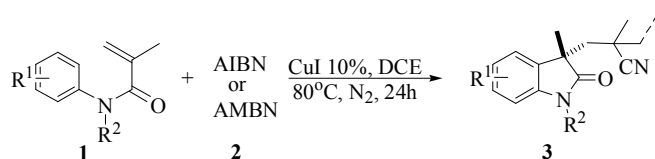

In an oven-dried Schlenk tube equipped with a magnetic stir bar, CuI (0.05 mmol) and **1** (0.5 mmol) was added. Then under nitrogen, 1 mL DCE was added. The resulting mixture was stirred at 80 °C for 24 h while **2** (1.5 mmol) dissolved in 1 mL DCE was added through micro injection pump into the mixture. Then the mixture was cooled down to room temperature and filtered through a pad of filter paper with the help of 50 mL of ethyl acetate. After evaporating the solvent under reduced pressure, the residue was purified by column chromatography (200-300 mesh silica gel) using ethyl acetate-petroleum ether as the eluent to give the pure product **3** (AcOEt / petroleum ether v/v = 1/4). All solid products were further purified by recrystallization.

### Date

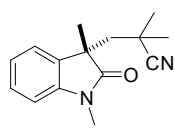

#### **3-(1,3-Dimethyl-2-oxo-2,3-dihydro-1H-indol-3-yl)-2,2-dimethyl-propionitrile:**

White solid, m.p. 118-120 °C; <sup>1</sup>H NMR (400 MHz, CDCl<sub>3</sub>) δ (ppm): 7.36-7.32 (m, 2H), 7.11 (t, *J* = 7.6 Hz, 1H), 6.91 (d, *J* = 8.0 Hz, 1H), 3.25 (s, 3H), 2.33 (d, *J* = 14.4 Hz, 1H), 2.17 (d, *J* = 14.4 Hz, 1H), 1.37 (s, 3H), 1.17 (s, 3H), 1.09 (s, 3H); <sup>13</sup>C NMR (100 MHz, CDCl<sub>3</sub>) δ (ppm): 179.6, 143.2, 130.9, 128.6, 124.7, 124.0, 122.5, 108.5, 47.0, 46.6, 30.7, 26.7, 27.4, 26.7, 26.4; HRMS (TOF MS EI<sup>+</sup>) [M]<sup>+</sup> calculated for C<sub>15</sub>H<sub>18</sub>N<sub>2</sub>O 242.1419, found 242.1422.

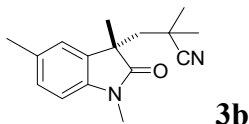

**2,2-Dimethyl-3-(1,3,5-trimethyl-2-oxo-2,3-dihydro-1H-indol-3-yl)-propionitrile:**

White solid, m.p. 124-126 °C; <sup>1</sup>H NMR (400 MHz, CDCl<sub>3</sub>) δ (ppm): 7.14-7.12 (m, 2H), 6.79 (d, *J* = 3.6 Hz, 1H), 3.22 (s, 3H), 2.36-2.30 (m, 4H), 2.15 (d, *J* = 14.8 Hz, 1H), 1.34 (s, 3H), 1.17 (s, 3H), 1.07 (s, 3H); <sup>13</sup>C NMR (100 MHz, CDCl<sub>3</sub>) δ (ppm): 179.6, 140.7, 132.0, 130.9, 128.8, 125.6, 124.1, 108.2, 47.0, 46.5, 30.8, 29.7, 27.5, 26.5, 26.4, 21.2; HRMS (TOF MS EI<sup>+</sup>) [*M*]<sup>+</sup> calculated for C<sub>16</sub>H<sub>20</sub>N<sub>2</sub>O 256.1576, found 256.1585.

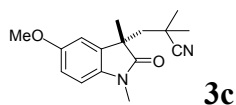

**3-(5-Methoxy-1,3-dimethyl-2-oxo-2,3-dihydro-1H-indol-3-yl)-2,2-dimethyl-**

**propionitrile:** <sup>1</sup>H NMR (400 MHz, CDCl<sub>3</sub>) δ (ppm): 6.95 (d, *J* = 1.6 Hz, 1H), 6.86 (dd, *J*<sub>1</sub> = 8.4 Hz, *J*<sub>2</sub> = 2.0 Hz, 1H), 6.81 (d, *J* = 8.4 Hz, 1H), 3.81 (s, 3H), 3.22 (s, 3H), 2.33 (d, *J* = 14.4 Hz, 1H), 2.15 (d, *J* = 14.4 Hz, 1H), 1.34 (s, 3H), 1.19 (s, 3H), 1.08 (s, 3H); <sup>13</sup>C NMR (100 MHz, CDCl<sub>3</sub>) δ (ppm): 179.3, 156.0, 136.7, 132.2, 124.1, 113.2, 112.2, 108.8, 56.0, 47.4, 46.4, 30.8, 29.7, 27.5, 26.4; HRMS (TOF MS EI<sup>+</sup>) [*M*]<sup>+</sup> calculated for C<sub>16</sub>H<sub>20</sub>N<sub>2</sub>O<sub>2</sub> 272.1525, found 272.1526.

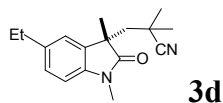

**3-(5-Ethyl-1,3-dimethyl-2-oxo-2,3-dihydro-1H-indol-3-yl)-2,2-dimethyl-**

**propionitrile:** White solid, m.p. 76-78 °C; <sup>1</sup>H NMR (400 MHz, CDCl<sub>3</sub>) δ (ppm): 7.16-7.14 (m, 2H), 6.82 (d, *J* = 8.0 Hz, 1H), 3.23 (s, 3H), 2.65 (q, *J* = 7.6 Hz, 2H), 2.32 (d, *J* = 14.8 Hz, 1H), 2.16 (d, *J* = 15.2 Hz, 1H), 1.35 (s, 3H), 1.23 (t, *J* = 7.6 Hz, 3H), 1.17 (s, 3H), 1.07 (s, 3H); <sup>13</sup>C NMR (100 MHz, CDCl<sub>3</sub>) δ (ppm): 179.7, 140.9, 138.7, 130.9, 127.7, 124.5, 124.1, 108.2, 47.1, 46.5, 30.8, 29.7, 28.7, 27.5, 26.5, 26.4, 15.9; HRMS (TOF MS EI<sup>+</sup>) [*M*]<sup>+</sup> calculated for C<sub>17</sub>H<sub>22</sub>N<sub>2</sub>O<sub>2</sub> 286.1681, found 286.1685.

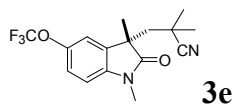

**3-(1,3-Dimethyl-2-oxo-5-trifluoromethoxy-2,3-dihydro-1H-indol-3-yl)-2,2-**

**dimethyl-propionitrile:** White solid, m.p. 114-116 °C; <sup>1</sup>H NMR (400 MHz, CDCl<sub>3</sub>) δ (ppm): 7.23-7.19 (m, 2H), 6.90 (d, *J* = 8.24 Hz, 1H), 3.25 (s, 3H), 2.36 (d, *J* = 14.8 Hz, 1H), 2.12 (d, *J* = 14.4 Hz, 1H), 1.37 (s, 3H), 1.14 (s, 6H); <sup>13</sup>C NMR (100 MHz, CDCl<sub>3</sub>) δ (ppm): 179.2, 144.7, 141.9, 132.7, 123.5, 121.9, 121.8, 118.5, 109.0, 47.3, 46.7, 30.6, 29.4, 27.4, 27.2, 26.5; HRMS (TOF MS EI<sup>+</sup>) [*M*]<sup>+</sup> calculated for C<sub>16</sub>H<sub>17</sub>F<sub>3</sub>N<sub>2</sub>O<sub>2</sub> 326.1242, found 326.1244.

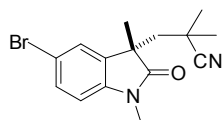

**3f**

**3-(5-Bromo-1,3-dimethyl-2-oxo-2,3-dihydro-1H-indol-3-yl)-2,2-dimethylpropionitrile:** Yellow solid, m.p. 116-118 °C; <sup>1</sup>H NMR (400 MHz, CDCl<sub>3</sub>) δ (ppm): 7.47-7.42 (m, 2H), 6.79 (d, *J* = 7.6 Hz, 1H), 3.23 (s, 3H), 2.33 (d, *J* = 14.4 Hz, 1H), 2.11 (d, *J* = 14.4 Hz, 1H), 1.36 (s, 3H), 1.17 (s, 3H), 1.12 (s, 3H); <sup>13</sup>C NMR (100 MHz, CDCl<sub>3</sub>) δ (ppm): 131.5, 127.8, 110.0, 47.2, 46.6, 30.6, 29.6, 27.3, 27.2, 26.5; HRMS (TOF MS EI<sup>+</sup>) [*M*]<sup>+</sup> calculated for C<sub>15</sub>H<sub>17</sub>BrN<sub>2</sub>O 320.0524, found 320.0524.

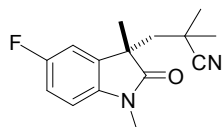

**3g**

**3-(5-Fluoro-1,3-dimethyl-2-oxo-2,3-dihydro-1H-indol-3-yl)-2,2-dimethylpropionitrile:** White solid, m.p. 107-109 °C; <sup>1</sup>H NMR (400 MHz, CDCl<sub>3</sub>) δ (ppm): 7.07-7.02 (m, 2H), 6.85-6.82 (m, 1H), 3.24 (d, *J* = 0.8 Hz, 3H), 2.33 (d, *J* = 14.4 Hz, 1H), 2.13 (d, *J* = 14.4 Hz, 1H), 1.35 (s, 3H), 1.18 (s, 3H), 1.12 (s, 3H); <sup>13</sup>C NMR (100 MHz, CDCl<sub>3</sub>) δ (ppm): 179.2, 160.4, 158.0, 139.1, 139.1, 132.7, 132.7, 123.7, 115.0, 114.8, 112.9, 112.6, 109.0, 109.0, 47.5, 47.5, 46.5, 30.6, 29.7, 27.3, 26.9, 26.5; HRMS (TOF MS EI<sup>+</sup>) [*M*]<sup>+</sup> calculated for C<sub>15</sub>H<sub>17</sub>FN<sub>2</sub>O 260.1325, found 260.1327.

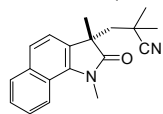

**3h**

**3-(1,3-Dimethyl-2-oxo-2,3-dihydro-1H-benzo[g]indol-3-yl)-2,2-dimethylpropionitrile:** Pale yellow solid, m.p. 138-140 °C; <sup>1</sup>H NMR (400 MHz, CDCl<sub>3</sub>) δ (ppm): 7.71 (d, *J* = 8.0 Hz, 1H), 7.50-7.35 (m, 4H), 6.91 (d, *J* = 8.0 Hz, 1H), 3.46 (s, 3H), 2.79 (d, *J* = 14.4 Hz, 1H), 2.17 (d, *J* = 14.4 Hz, 1H), 1.67 (s, 3H), 1.06 (s, 3H), 0.95 (s, 3H); <sup>13</sup>C NMR (100 MHz, CDCl<sub>3</sub>) δ (ppm): 172.5, 136.4, 135.4, 133.5, 126.9, 126.7, 126.6, 124.4, 123.9, 122.9, 119.6, 108.8, 52.5, 45.8, 34.8, 30.9, 29.7, 29.5, 27.4; HRMS (TOF MS EI<sup>+</sup>) [*M*]<sup>+</sup> calculated for C<sub>19</sub>H<sub>20</sub>N<sub>2</sub>O 292.1576, found 292.1581.

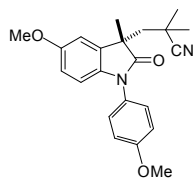

**3i**

**3-[5-Methoxy-1-(4-methoxy-phenyl)-3-methyl-2-oxo-2,3-dihydro-1H-indol-3-yl]-2,2-dimethylpropionitrile:** Yellow solid, m.p. 139-140 °C; <sup>1</sup>H NMR (400 MHz, CDCl<sub>3</sub>) δ (ppm): 7.27 (d, *J* = 8.8 Hz, 2H), 6.97-6.93 (m, 3H), 6.73-6.67 (m, 2H), 3.79 (s, 3H), 3.75 (s, 3H), 2.34 (d, *J* = 14.4 Hz, 1H), 2.18 (d, *J* = 14.4 Hz, 1H), 1.39 (s, 3H), 1.22 (s, 3H), 1.12 (s, 3H); <sup>13</sup>C NMR (100 MHz, CDCl<sub>3</sub>) δ (ppm): 178.9, 159.1, 156.1, 136.9, 131.9, 127.5, 127.3, 124.3, 114.9, 113.4, 112.1, 110.2, 56.0, 55.6, 47.5, 46.4, 30.9, 30.0, 28.4, 26.3; HRMS (TOF MS EI<sup>+</sup>) [*M*]<sup>+</sup> calculated for C<sub>22</sub>H<sub>24</sub>N<sub>2</sub>O<sub>3</sub> 364.1787, found 364.1789.

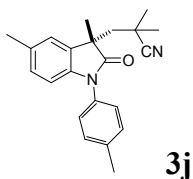

**3-(3,5-Dimethyl-2-oxo-1-p-tolyl-2,3-dihydro-1H-indol-3-yl)-2,2-dimethylpropionitrile:** Yellow solid, m.p. 153-156 °C; <sup>1</sup>H NMR (400 MHz, CDCl<sub>3</sub>) δ (ppm): 7.30 (s, 4H), 7.21 (s, 1H), 7.04 (d, *J* = 8 Hz, 1H), 6.76 (d, *J* = 8 Hz, 1H), 2.40-2.36 (m, 7H), 2.26 (d, *J* = 14.4 Hz, 1H), 1.45 (s, 3H), 1.28 (s, 3H), 1.17 (s, 3H); <sup>13</sup>C NMR (100 MHz, CDCl<sub>3</sub>) δ (ppm): 179.1, 140.8, 137.9, 132.4, 130.0, 130.6, 130.2, 128.7, 126.0, 125.9, 124.3, 109.6, 47.2, 46.5, 30.9, 30.0, 28.3, 26.3, 21.2, 21.2; HRMS (TOF MS EI<sup>+</sup>) [*M*]<sup>+</sup> calculated for C<sub>22</sub>H<sub>24</sub>N<sub>2</sub>O 332.1889, found 332.1885.

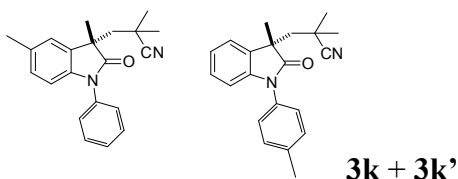

**3-(3,5-Dimethyl-2-oxo-1-phenyl-2,3-dihydro-1H-indol-3-yl)-2,2-dimethylpropionitrile and 2,2-Dimethyl-3-(3-methyl-2-oxo-1-p-tolyl-2,3-dihydro-1H-indol-3-yl)propionitrile:**

Yellow solid, m.p. 129-130 °C; <sup>1</sup>H NMR (400 MHz, CDCl<sub>3</sub>) δ (ppm): 7.54-7.39 (m, 2H), 7.34-7.12 (m, 4H), 7.16-7.05 (m, 1H), 6.87 (d, *J* = 7.6 Hz, 0.73H), 6.79 (d, *J* = 8.0 Hz, 0.26H), 2.42-2.37 (m, 4H), 2.31-2.25 (m, 1H), 1.47 (s, 3H), 1.28 (s, 3H), 1.19 (s, 3H); <sup>13</sup>C NMR (100 MHz, CDCl<sub>3</sub>) δ (ppm): 179.1, 143.3, 138.1, 131.8, 130.7, 130.3, 129.6, 128.5, 126.2, 126.2, 125.0, 124.2, 122.8, 109.9, 47.2, 46.5, 30.9, 30.0, 28.3, 28.3, 26.4, 21.2; HRMS (TOF MS EI<sup>+</sup>) [*M*]<sup>+</sup> calculated for C<sub>21</sub>H<sub>22</sub>N<sub>2</sub>O 318.1732, found 318.1732.

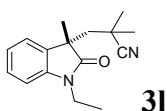

**3-(1-Ethyl-3-methyl-2-oxo-2,3-dihydro-1H-indol-3-yl)-2,2-dimethylpropionitrile:** Colourless liquid; <sup>1</sup>H NMR (400 MHz, CDCl<sub>3</sub>) δ (ppm): 7.36-7.30 (m, 2H), 7.10 (t, *J* = 7.6 Hz, 1H), 6.93 (d, *J* = 8.0 Hz, 1H), 3.89-3.71 (m, 2H), 2.33 (d, *J* = 14.4 Hz, 1H), 2.21 (d, *J* = 14.4 Hz, 1H), 1.34 (s, 3H), 1.28 (t, *J* = 7.2 Hz, 3H), 1.21 (s, 3H), 1.07 (s, 3H); <sup>13</sup>C NMR (100 MHz, CDCl<sub>3</sub>) δ (ppm): 179.2, 142.1, 131.1, 128.5, 125.0, 124.1, 122.2, 108.6, 46.9, 46.2, 34.8, 30.8, 29.7, 27.9, 26.3, 12.3; HRMS (TOF MS EI<sup>+</sup>) [*M*]<sup>+</sup> calculated for C<sub>16</sub>H<sub>20</sub>N<sub>2</sub>O 256.1576, found 256.1572.

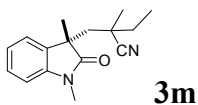

**2-(1,3-Dimethyl-2-oxo-2,3-dihydro-1H-indol-3-ylmethyl)-2-methylbutyronitrile:** Yellow thick liquid; <sup>1</sup>H NMR (400 MHz, CDCl<sub>3</sub>) δ (ppm): 7.29-7.19 (m, 2H), 7.06-

6.99 (m, 1H), 6.83 (d,  $J = 7.6$  Hz, 1H), 3.16 (s, 3H), 2.35 (d,  $J = 14.4$  Hz, 0.5H), 2.21-1.13 (m, 1H), 1.96 (d,  $J = 14.4$  Hz, 0.5H), 1.35-1.18 (m, 5H), 0.93-0.87 (m, 6H);  $^{13}\text{C}$  NMR (100 MHz,  $\text{CDCl}_3$ )  $\delta$  (ppm): 180.0, 179.5, 143.4, 143.0, 131.5, 130.9, 128.6, 128.5, 124.9, 124.2, 123.2, 122.7, 122.5, 122.2, 108.6, 108.4, 46.9, 46.9, 45.4, 44.5, 35.6, 35.5, 35.2, 33.2, 27.8, 27.6, 26.4, 26.4, 25.8, 22.8, 9.1, 9.0; HRMS (TOF MS  $\text{EI}^+$ )  $[\text{M}]^+$  calculated for  $\text{C}_{16}\text{H}_{20}\text{N}_2\text{O}$  256.1576, found 256.1579.

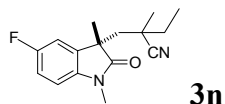

**3n**

**2-(5-Fluoro-1,3-dimethyl-2-oxo-2,3-dihydro-1H-indol-3-ylmethyl)-2-methylbutyronitrile:** Thick pale yellow liquid;  $^1\text{H}$  NMR (400 MHz,  $\text{CDCl}_3$ )  $\delta$  (ppm): 7.12-7.01 (m, 2H), 6.84 (m, 1H), 3.24 (s, 3H), 2.44 (d,  $J = 14.4$  Hz, 0.5H), 2.23 (s, 1H), 2.01 (d,  $J = 14.4$  Hz, 0.5H) 1.36-1.48 (m, 5H), 1.04-0.94 (m, 6H);  $^{13}\text{C}$  NMR (100 MHz,  $\text{CDCl}_3$ )  $\delta$  (ppm): 179.5 179.0, 160.4, 160.3, 158.0, 157.9, 139.3, 139.3, 139.0, 139.0, 133.3, 133.2, 132.7, 132.6, 123.0, 122.5, 115.0, 114.9, 114.7, 114.7, 113.0, 112.8, 112.4, 112.1, 109.2, 109.1, 109.0, 108.9, 47.4, 47.4, 47.3, 47.3, 45.3, 44.5, 35.5, 35.4, 35.2, 33.4, 27.7, 27.5, 26.5, 26.5, 25.9, 23.0, 9.0, 8.9; HRMS (TOF MS  $\text{EI}^+$ )  $[\text{M}]^+$  calculated for  $\text{C}_{16}\text{H}_{19}\text{FN}_2\text{O}$  274.1481, found 274.1486.

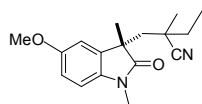

**3o**

**2-(5-Methoxy-1,3-dimethyl-2-oxo-2,3-dihydro-1H-indol-3-ylmethyl)-2-methylbutyronitrile:** Thick pale yellow liquid;  $^1\text{H}$  NMR (400 MHz,  $\text{CDCl}_3$ )  $\delta$  (ppm): 6.99 (d,  $J = 2.4$  Hz, 1H), 6.88-6.85 (m, 1H), 6.80 (d,  $J = 8.8$  Hz, 1H), 6.79 (s, 0.33H), 3.82 (s, 3H), 3.22 (s, 3H), 2.24 (s, 2H), 1.60-1.50 (m, 1H), 1.47-1.38(m, 1H), 1.34 (s, 3H), 0.99 (t,  $J = 7.2$  Hz, 3H), 0.96 (s, 3H);  $^{13}\text{C}$  NMR (100 MHz,  $\text{CDCl}_3$ )  $\delta$  (ppm): 179.7, 156.0, 136.5, 132.1, 123.5, 113.4, 112.3, 108.8, 56.0, 47.3, 44.3, 35.5, 35.4, 28.0, 26.5, 22.5; HRMS (TOF MS  $\text{EI}^+$ )  $[\text{M}]^+$  calculated for  $\text{C}_{17}\text{H}_{22}\text{N}_2\text{O}_2$  286.1681, found 281.1685.

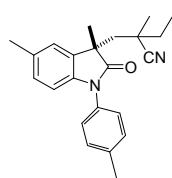

**3p**

**2-(3,5-Dimethyl-2-oxo-1-p-tolyl-2,3-dihydro-1H-indol-3-ylmethyl)-2-methylbutyronitrile:** Yellow solid, m.p. 153-156 °C;  $^1\text{H}$  NMR (400 MHz,  $\text{CDCl}_3$ )  $\delta$  (ppm): 7.32-7.24 (m, 4H), 7.24 (s, 1H), 7.05 (d,  $J = 8.0$  Hz, 1H), 6.75 (d,  $J = 8.0$  Hz, 1H), 2.41 (s, 3H), 2.37-2.27 (m, 5H), 1.66-1.57 (m, 1H), 1.54-1.49 (m, 1H), 1.45 (s, 3H), 1.09 (s, 3H), 1.03 (t,  $J = 7.6$  Hz, 3H);  $^{13}\text{C}$  NMR (100 MHz,  $\text{CDCl}_3$ )  $\delta$  (ppm): 179.5, 140.7, 137.9, 132.5, 130.6, 130.2, 128.7, 126.1, 126.0, 123.6, 109.5, 47.1, 44.5, 35.7, 35.6, 28.5, 22.7, 21.2, 21.2, 9.0; HRMS (TOF MS  $\text{EI}^+$ )  $[\text{M}]^+$  calculated for  $\text{C}_{23}\text{H}_{26}\text{N}_2\text{O}$  346.2045, found 346.2041.

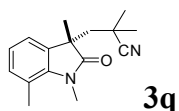

**2,2-Dimethyl-3-(1,3,7-trimethyl-2-oxo-2,3-dihydro-1H-indol-3-yl)-propionitrile:**

White solid; m.p. 110-112 °C; <sup>1</sup>H NMR (400 MHz, CDCl<sub>3</sub>) δ (ppm): 7.13 (d, *J* = 6.8 Hz, 1H), 7.06 (d, *J* = 6.8 Hz, 1H), 6.99 (t, *J* = 7.2 Hz, 1H), 3.52 (s, 3H), 2.61 (s, 3H), 2.32 (d, *J* = 14.4 Hz, 1H), 2.12 (d, *J* = 14.4 Hz, 1H), 1.33 (s, 3H), 1.15 (s, 3H), 1.11 (s, 3H); <sup>13</sup>C NMR (100 MHz, CDCl<sub>3</sub>) δ (ppm): 180.4, 141.0, 137.9, 132.3, 131.6, 124.0, 122.5, 122.4, 120.2, 46.8, 46.3, 30.7, 29.8, 29.6, 27.8, 26.9, 19.1; HRMS (TOF MS EI<sup>+</sup>) [*M*]<sup>+</sup> calculated for C<sub>16</sub>H<sub>20</sub>N<sub>2</sub>O 256.1576, found 256.1576.

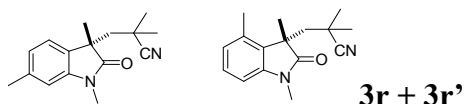

**2,2-Dimethyl-3-(1,3,6-trimethyl-2-oxo-2,3-dihydro-1H-indol-3-yl)-propionitrile and 2,2-Dimethyl-3-(1,3,4-trimethyl-2-oxo-2,3-dihydro-1H-indol-3-yl)-propionitrile:**

Colourless oil; <sup>1</sup>H NMR (400 MHz, CDCl<sub>3</sub>) δ (ppm): 7.26-7.18 (m, 1H), 6.92 (d, *J* = 3.6 Hz, 0.38H), 6.87 (d, *J* = 3.6 Hz, 0.62H), 6.76-6.73 (m, 1H), 3.22 (s, 3H), 2.45 (s, 1.83H), 2.40 (s, 1.15H), 2.38-2.12 (m, 2H), 1.42 (s, 1.85H), 1.32 (s, 1.15H), 1.19 (s, 3H), 1.09 (s, 3H); <sup>13</sup>C NMR (100 MHz, CDCl<sub>3</sub>) δ (ppm): 180.0, 179.6, 143.4, 143.2, 138.8, 135.8, 128.5, 128.2, 127.9, 125.3, 124.5, 124.1, 123.4, 123.0, 109.4, 106.2, 47.7, 46.8, 46.5, 45.2, 30.9, 30.7, 29.7, 29.2, 27.6, 26.6, 26.4, 26.4, 26.3, 26.2, 24.6, 21.9, 18.9; HRMS (TOF MS EI<sup>+</sup>) [*M*]<sup>+</sup> calculated for C<sub>16</sub>H<sub>20</sub>N<sub>2</sub>O 256.1576, found 256.1573.

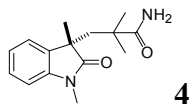

**3-(1,3-Dimethyl-2-oxo-2,3-dihydro-1H-indol-3-yl)-2,2-dimethyl-propionamide:**

White solid; <sup>1</sup>H NMR (400 MHz, CDCl<sub>3</sub>) δ (ppm): 7.28-7.23 (m, 2H), 7.02 (t, *J* = 7.6 Hz, 1H), 6.83 (d, *J* = 8.0 Hz, 1H), 5.17 (br, 2H), 3.22 (s, 3H), 2.64 (d, *J* = 14.4 Hz, 1H), 2.17 (d, *J* = 14.4 Hz, 1H), 1.31 (s, 3H), 1.05 (s, 3H), 0.81 (s, 3H); <sup>13</sup>C NMR (100 MHz, CDCl<sub>3</sub>) δ (ppm): 181.0, 180.2, 142.9, 132.0, 127.8, 125.5, 122.3, 107.8, 47.4, 46.4, 41.6, 27.8, 26.3, 22.4; HRMS (TOF MS EI<sup>+</sup>) [*M*]<sup>+</sup> calculated for C<sub>15</sub>H<sub>20</sub>N<sub>2</sub>O<sub>2</sub> 260.1525, found 260.1526.

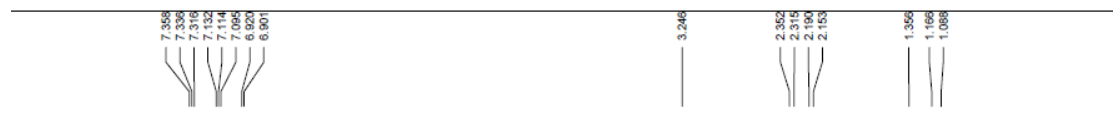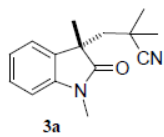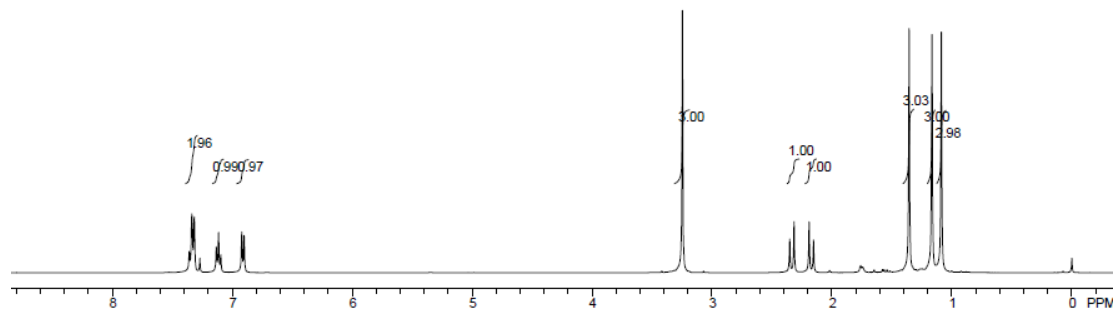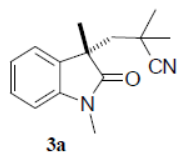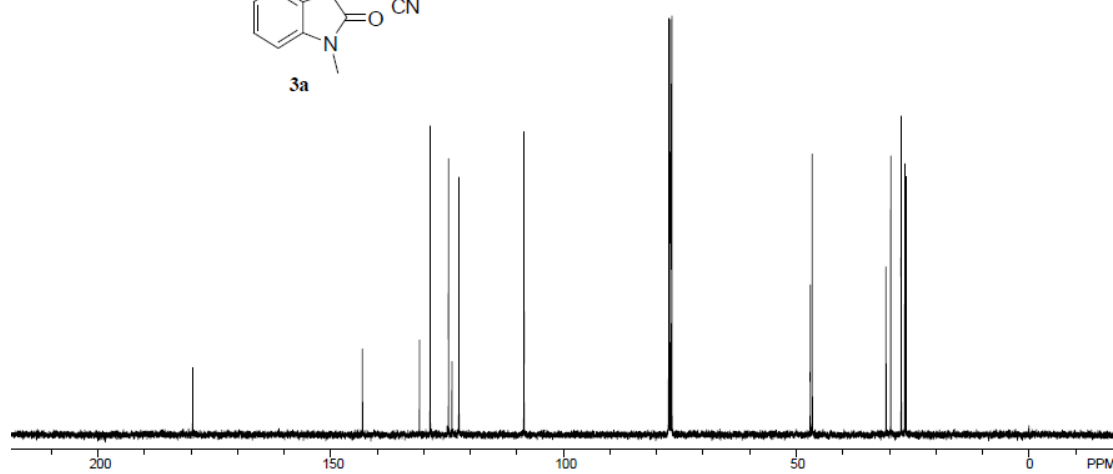



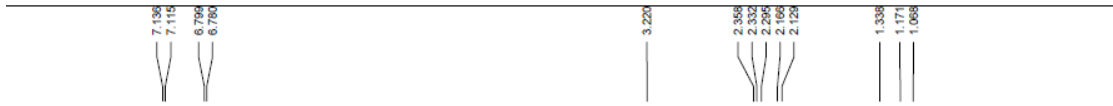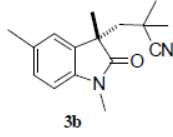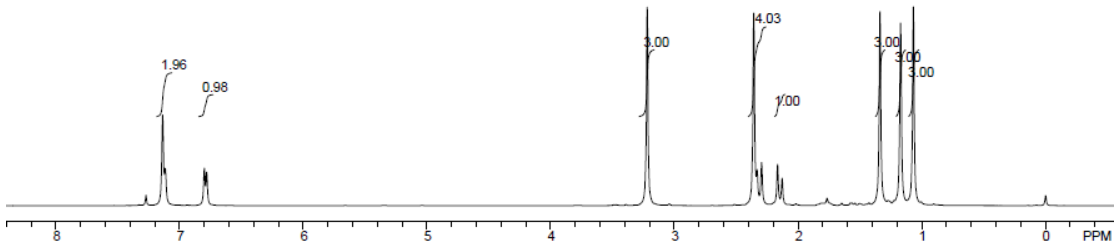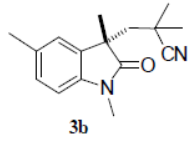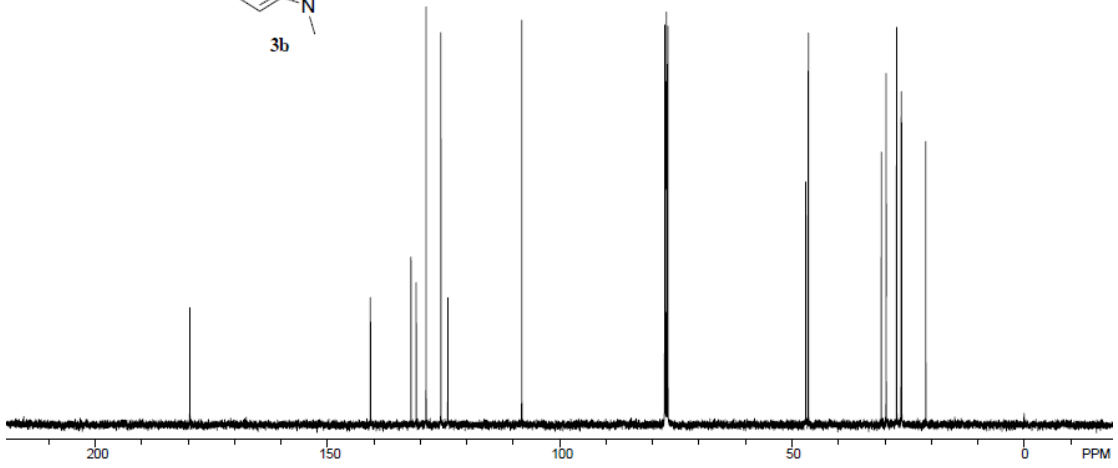

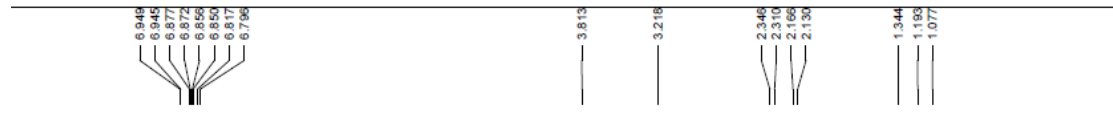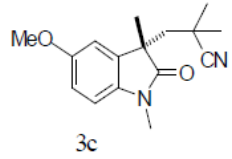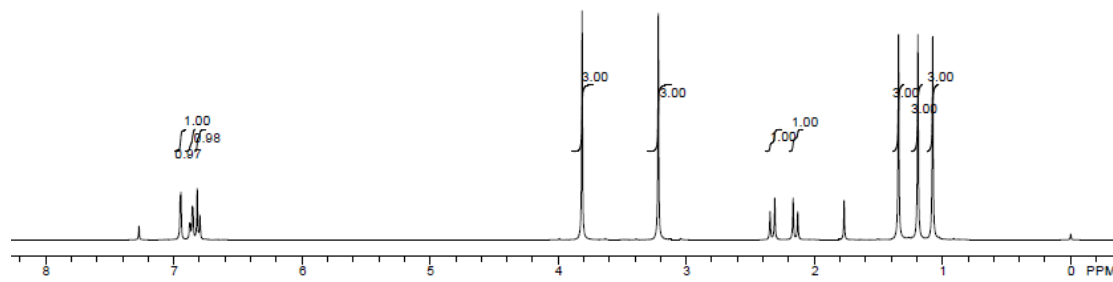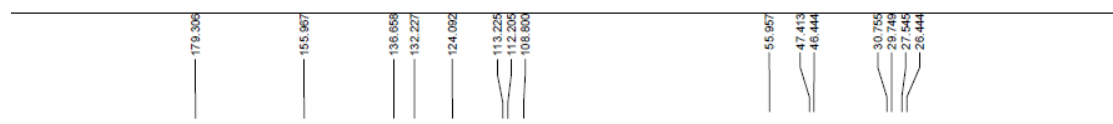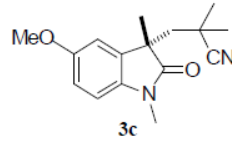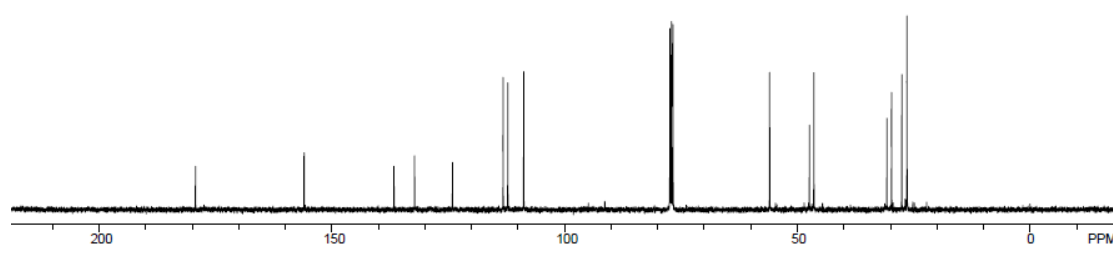

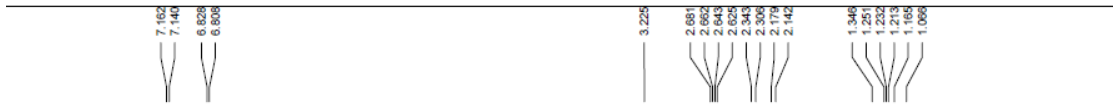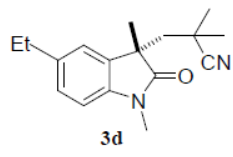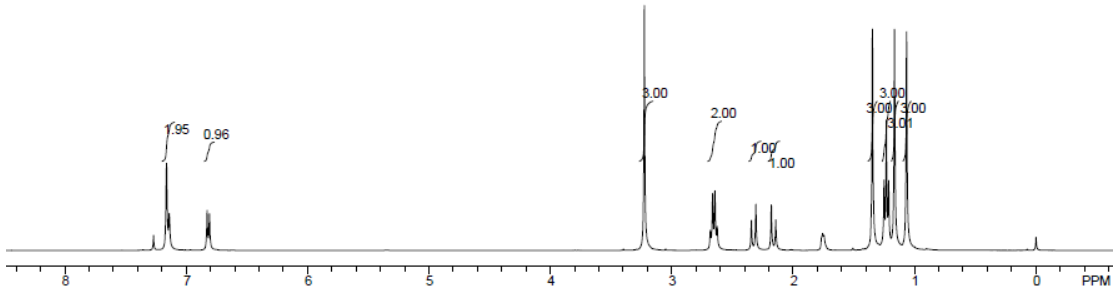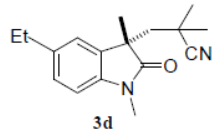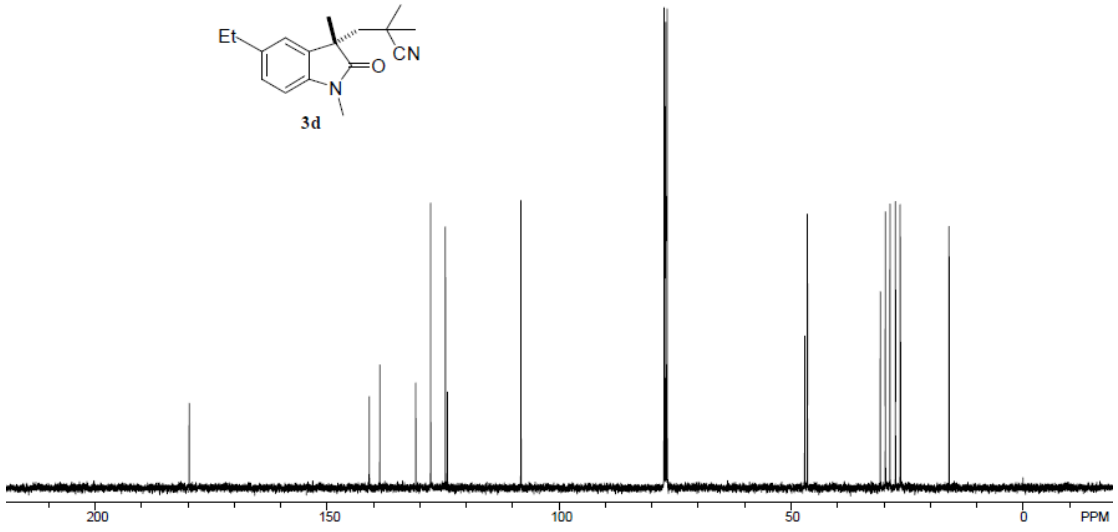

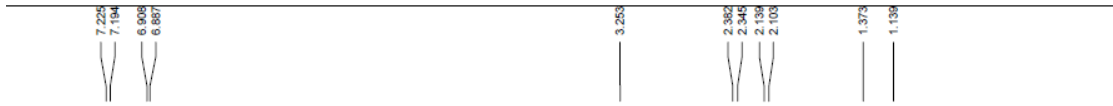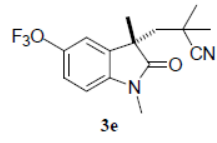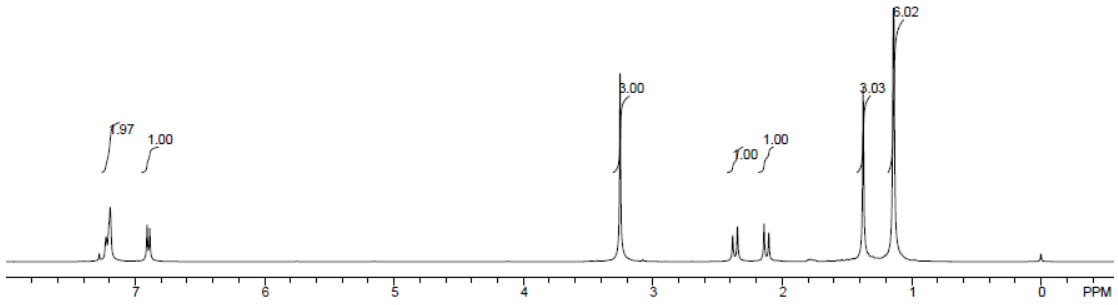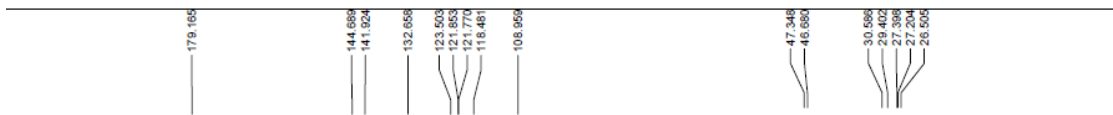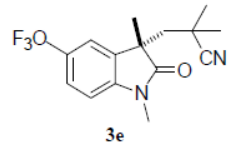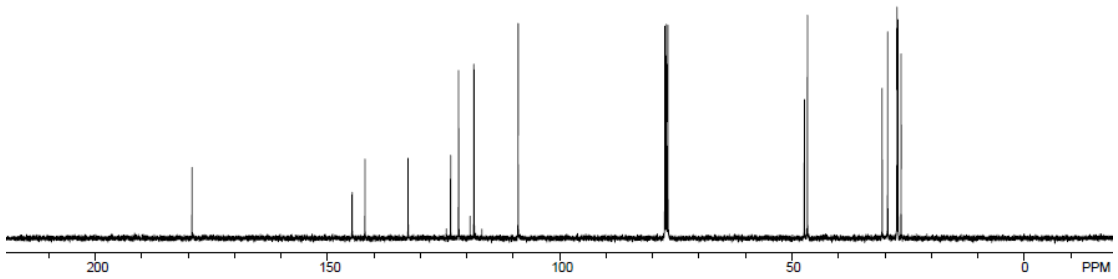

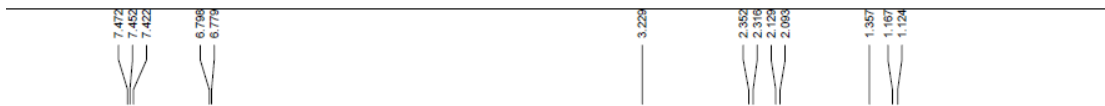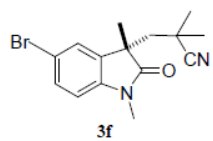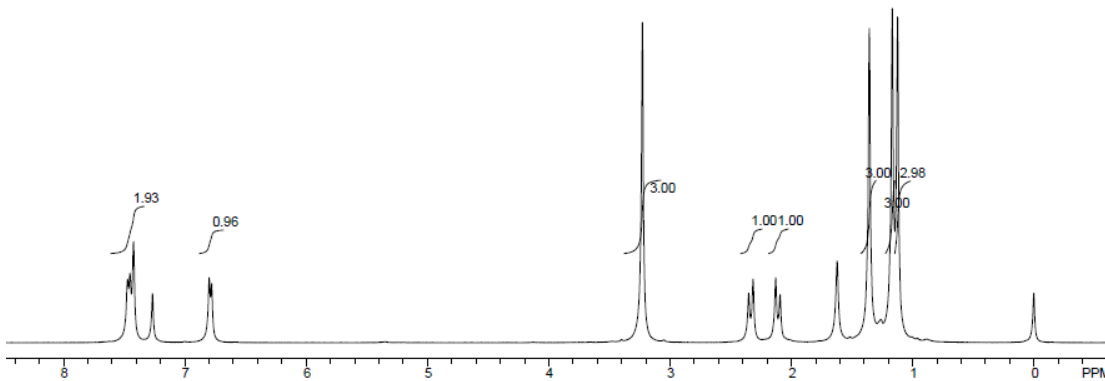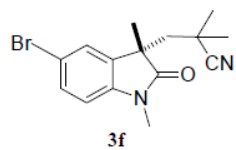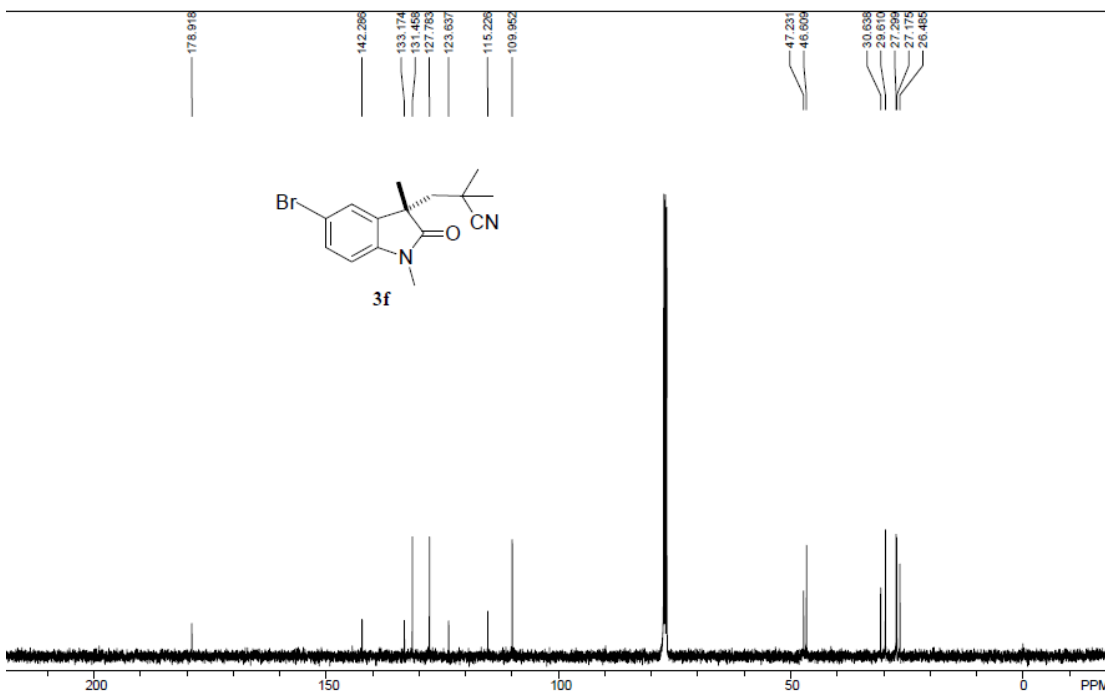

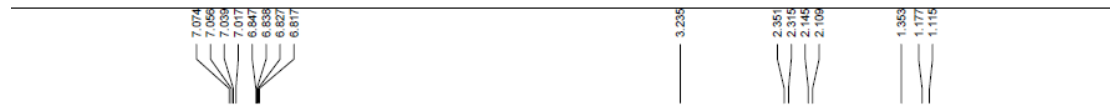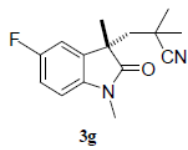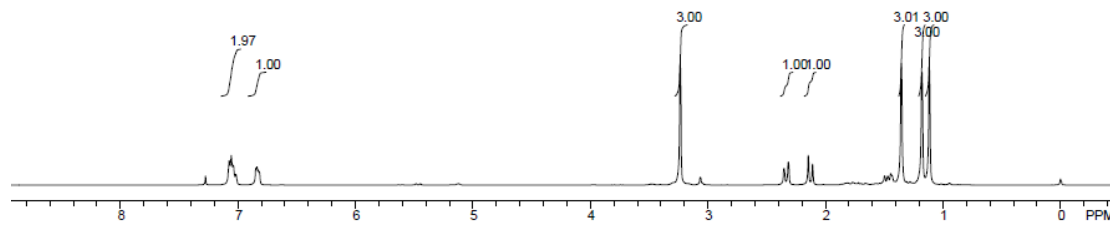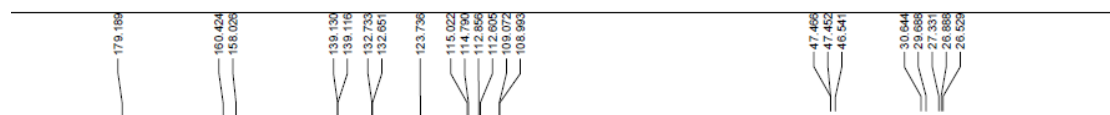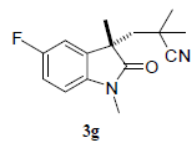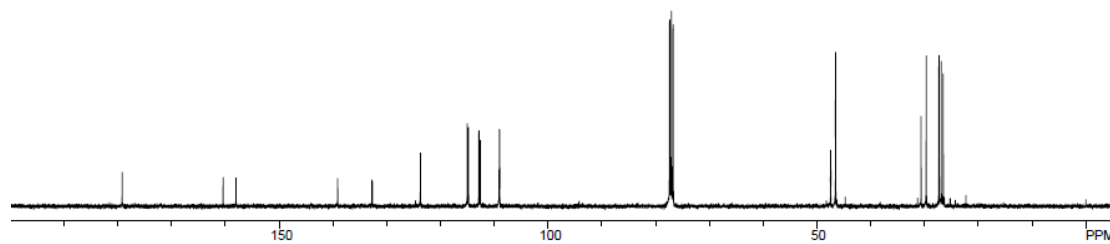

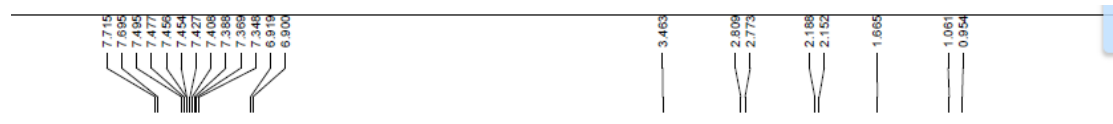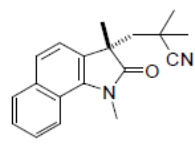

**3h**

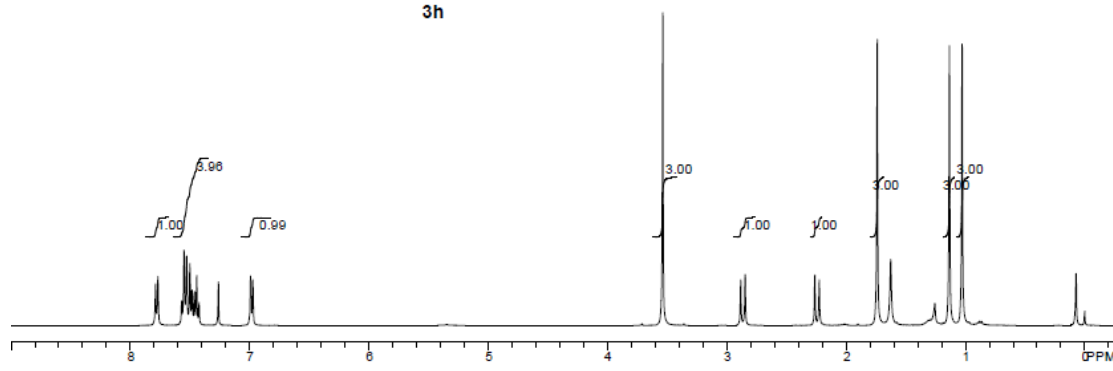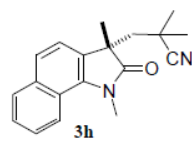

**3h**

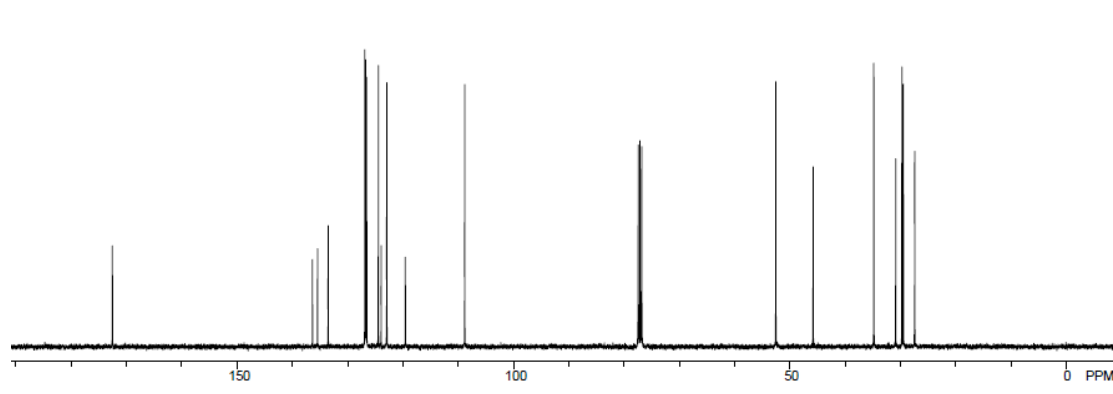

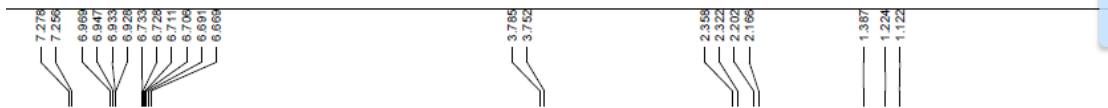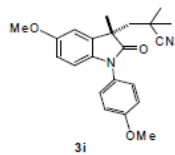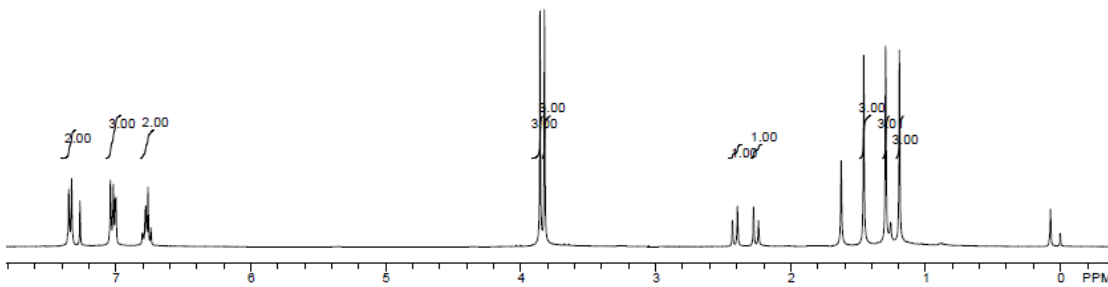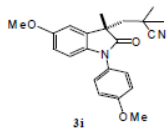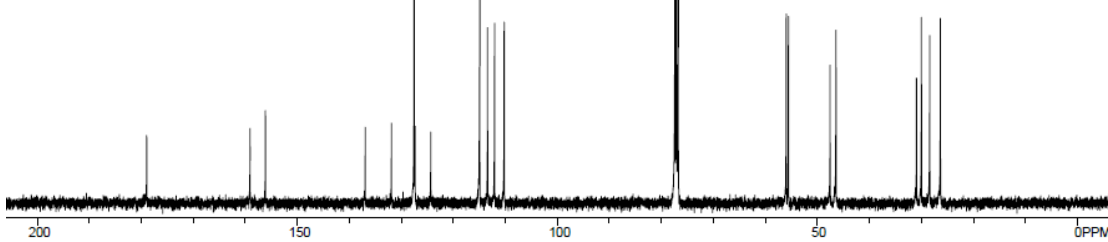



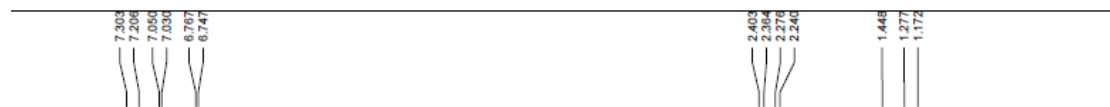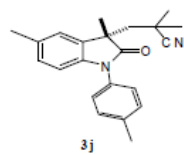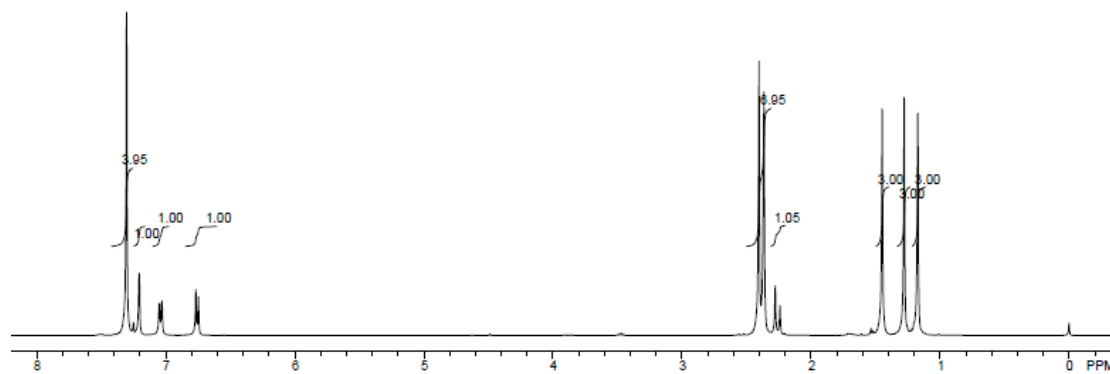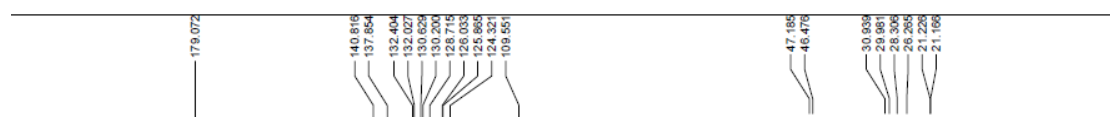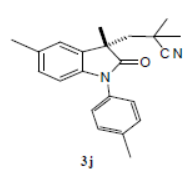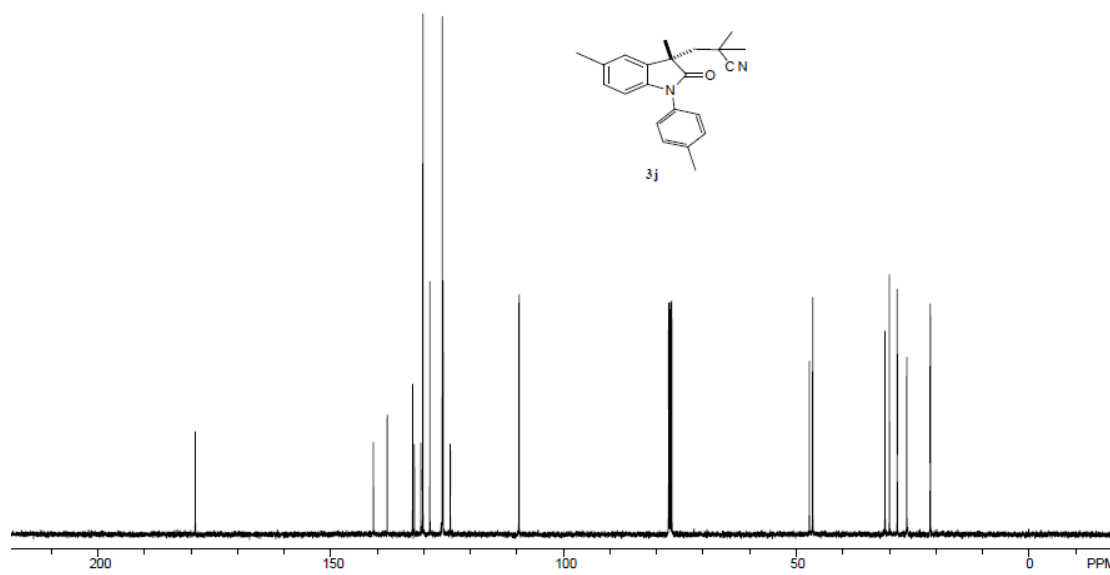

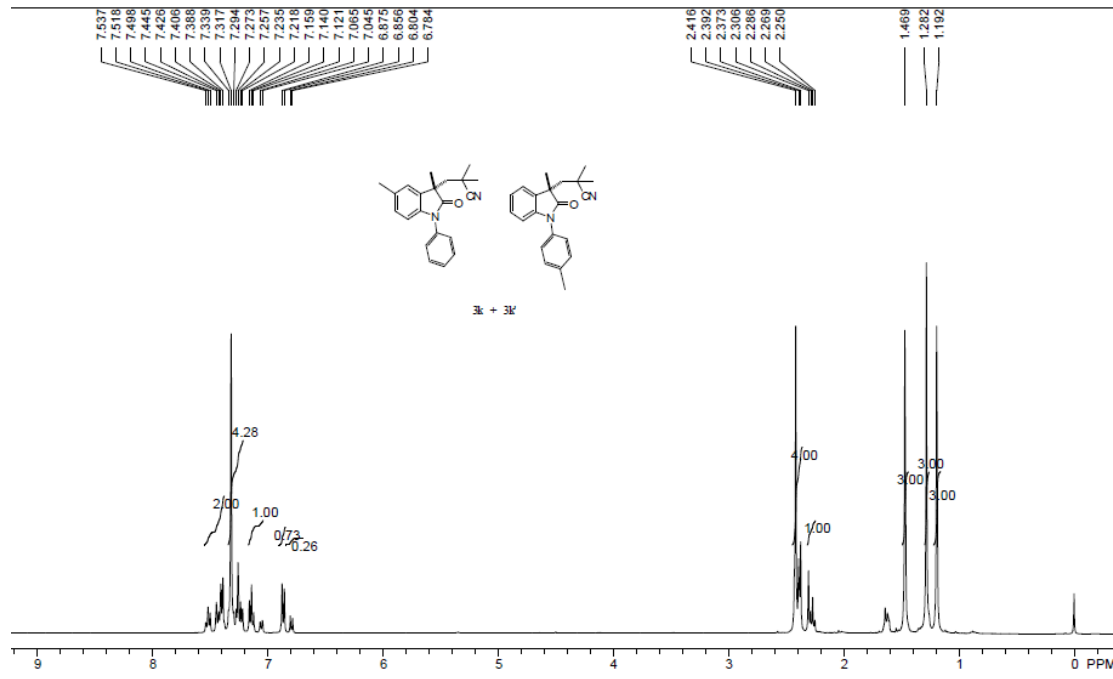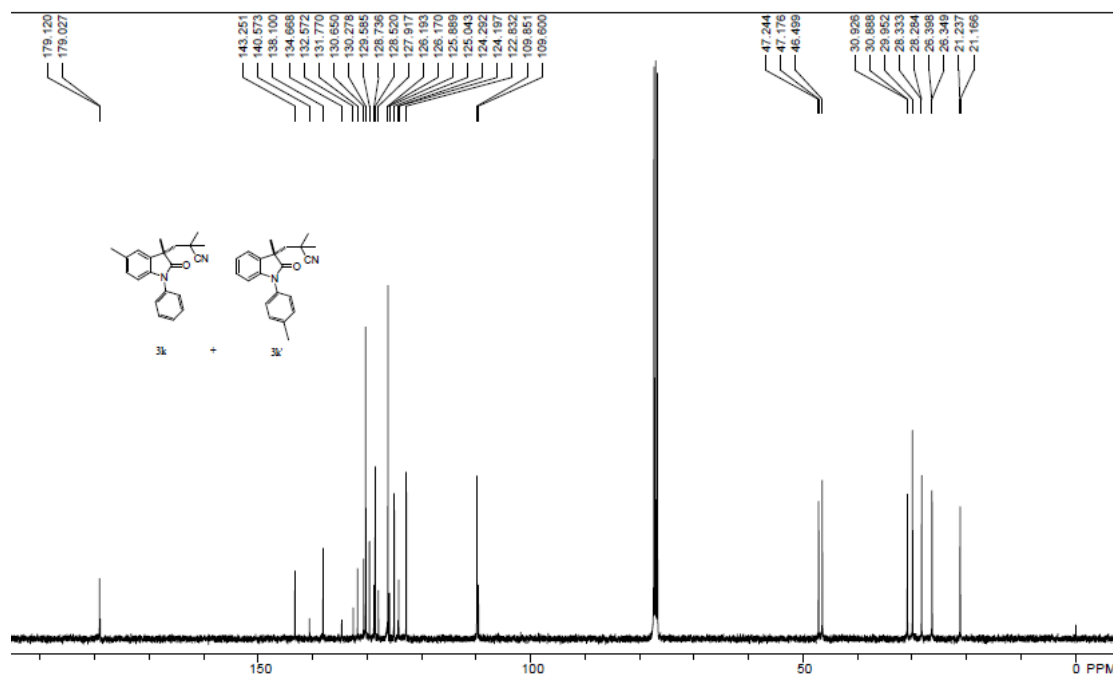

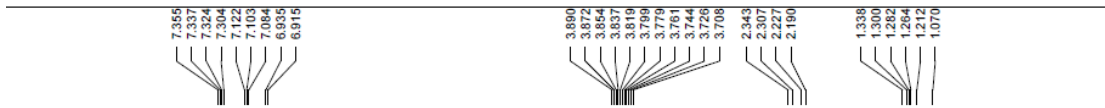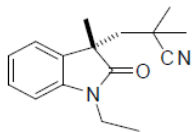

31

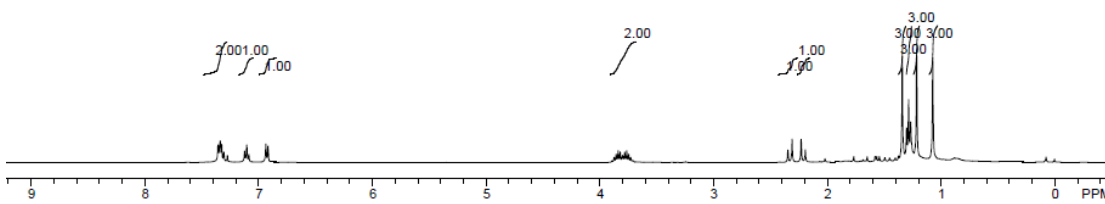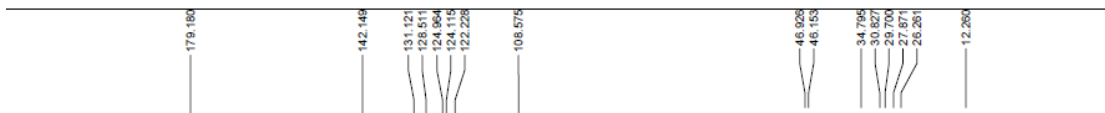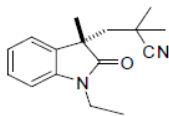

31

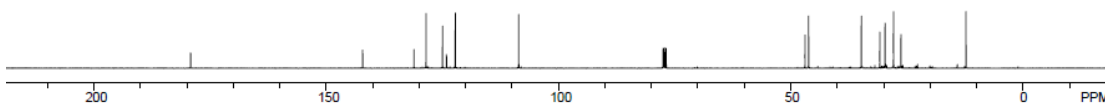

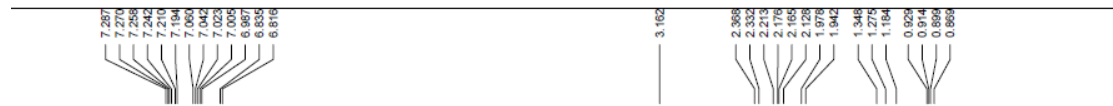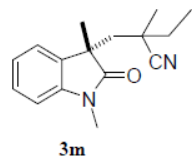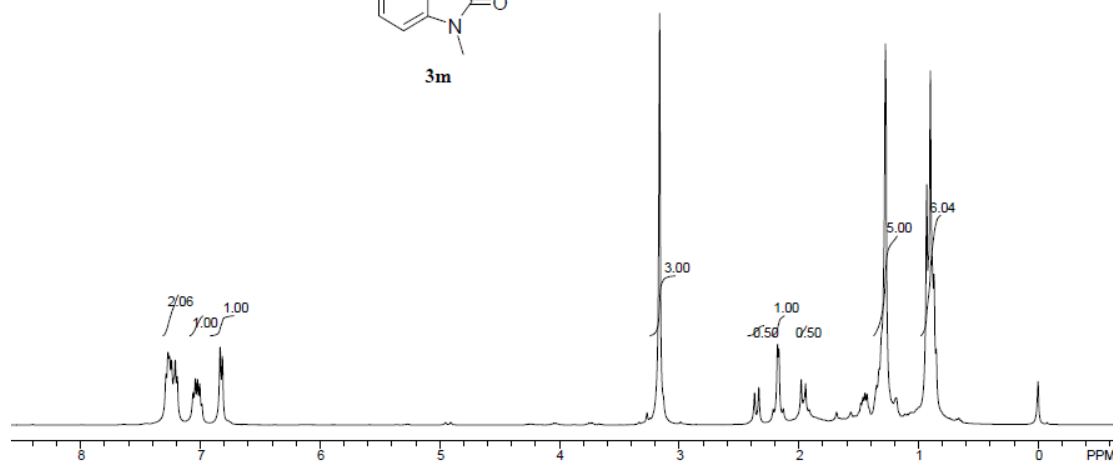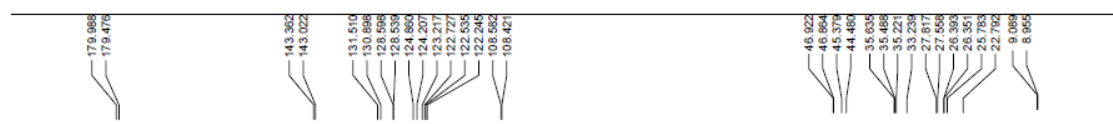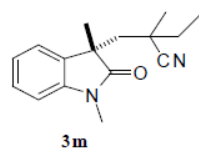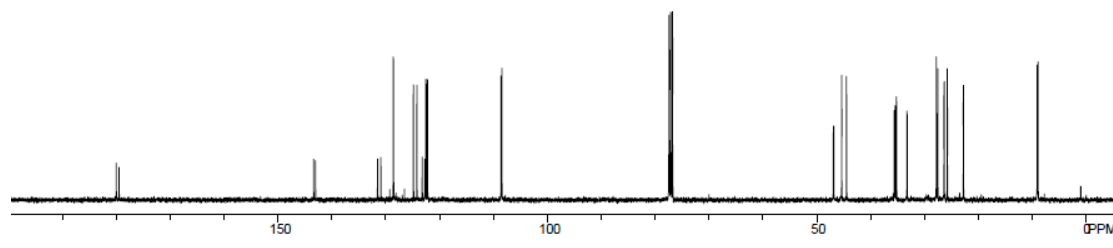

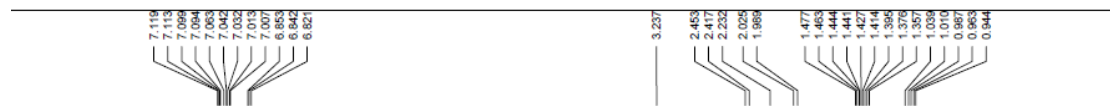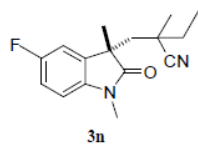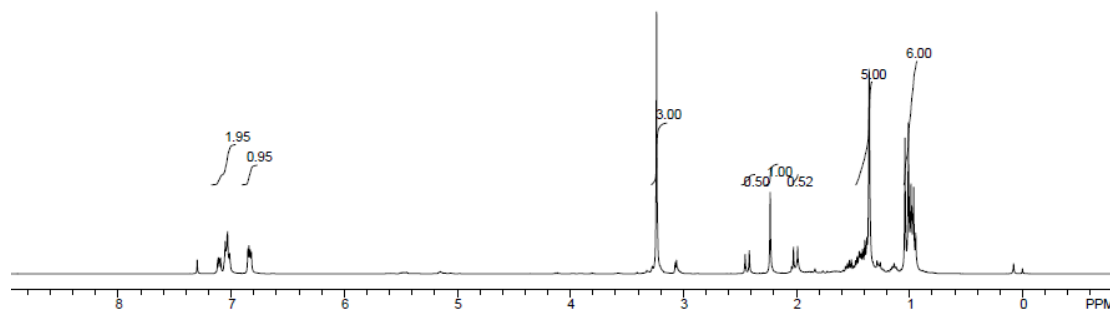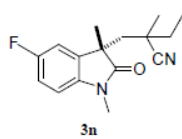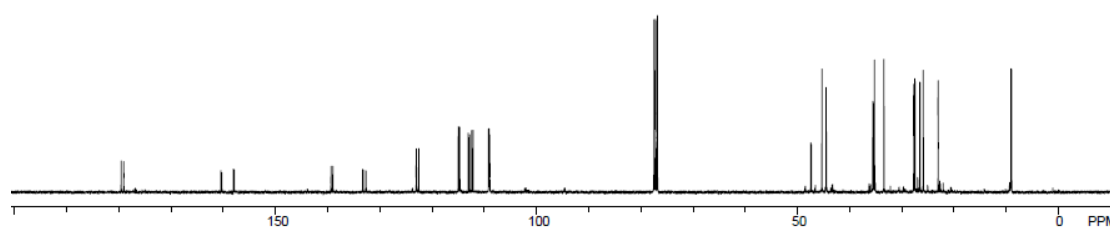

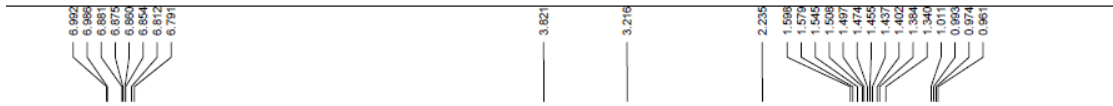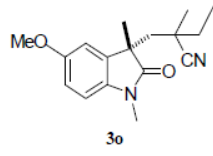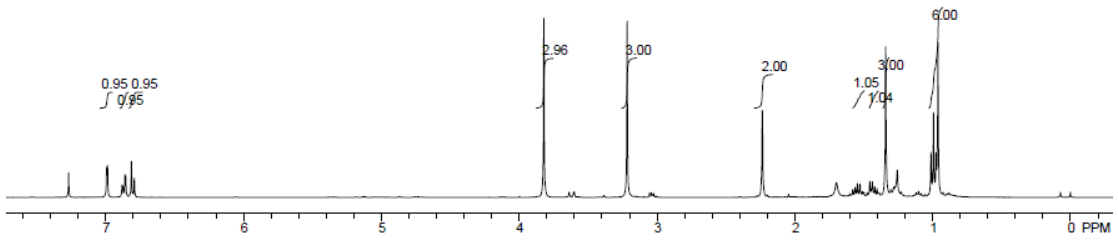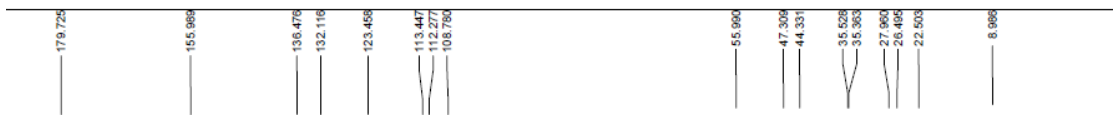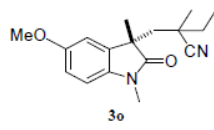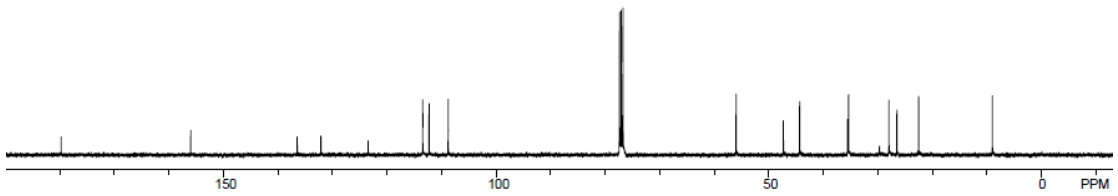

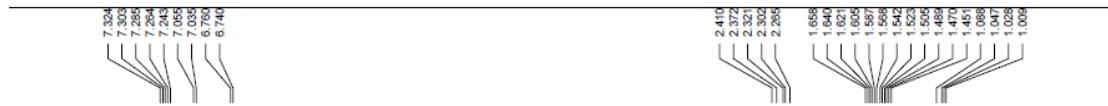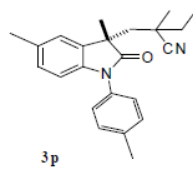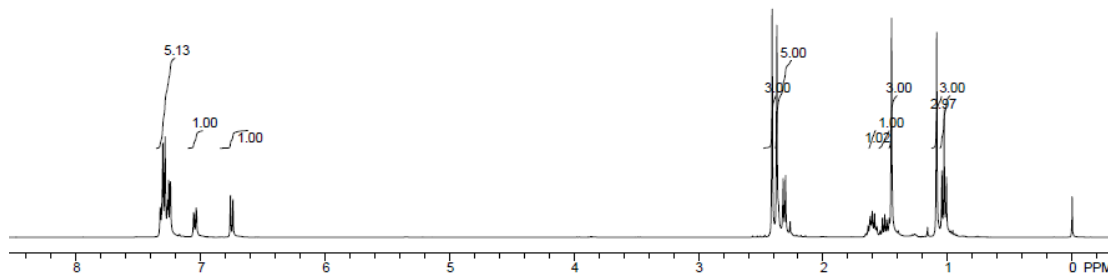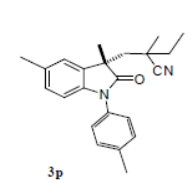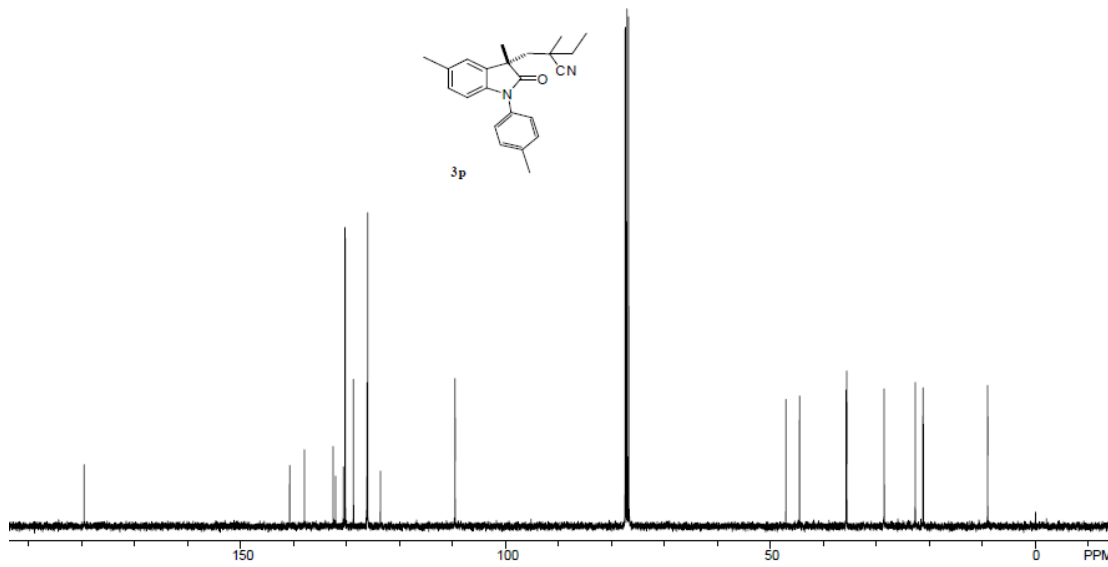

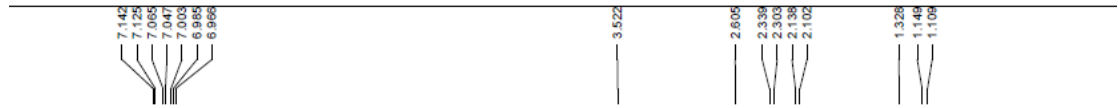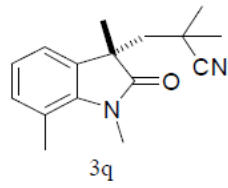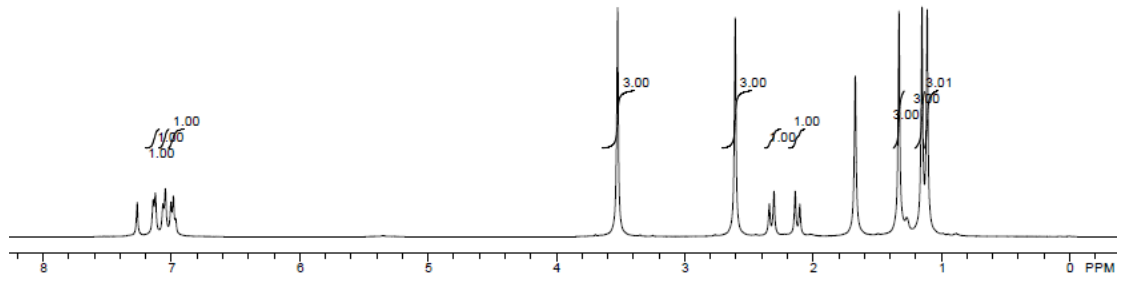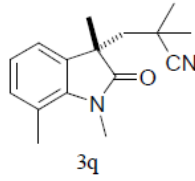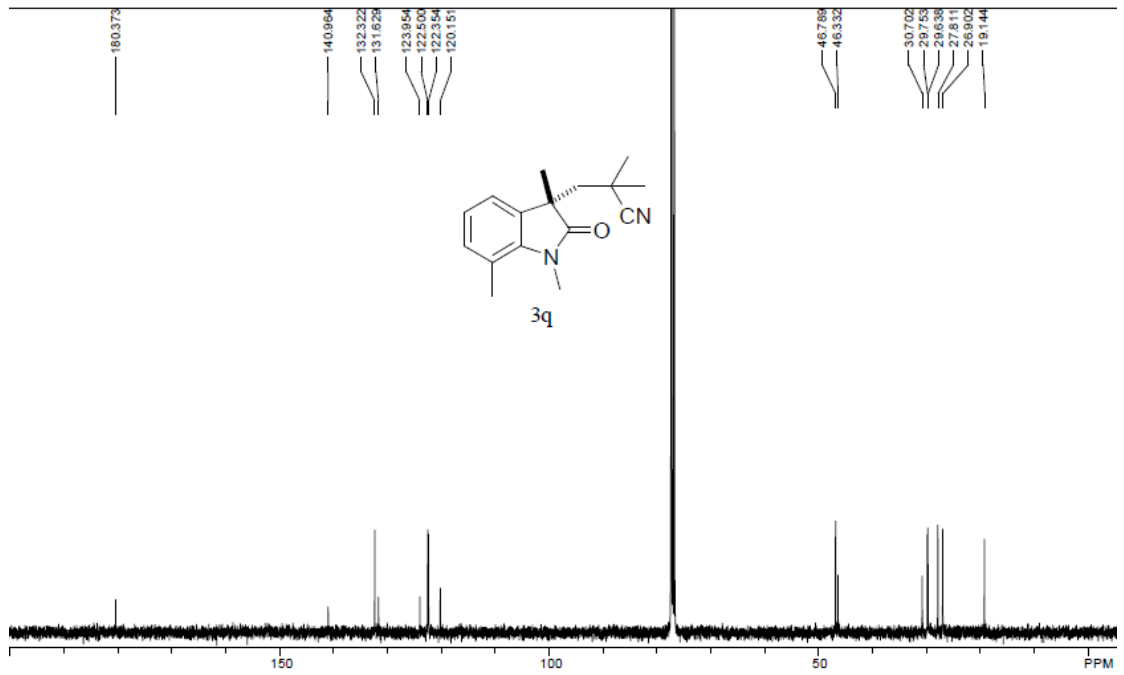



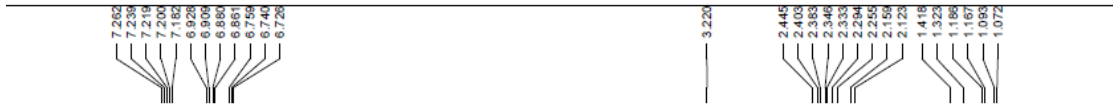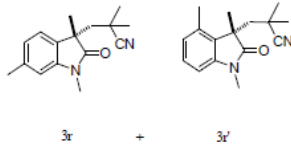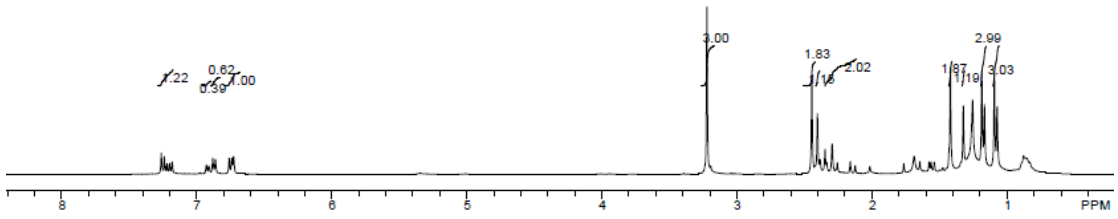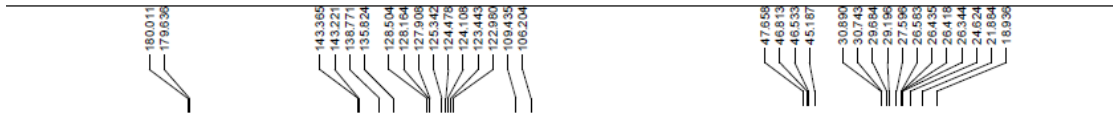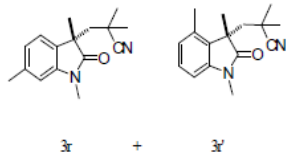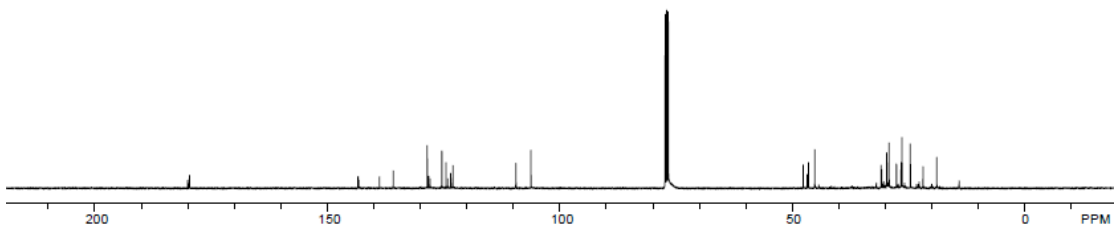

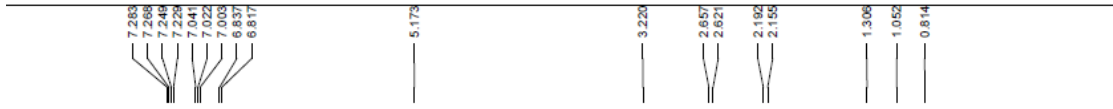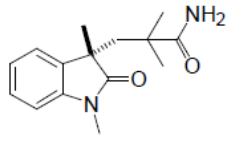

4

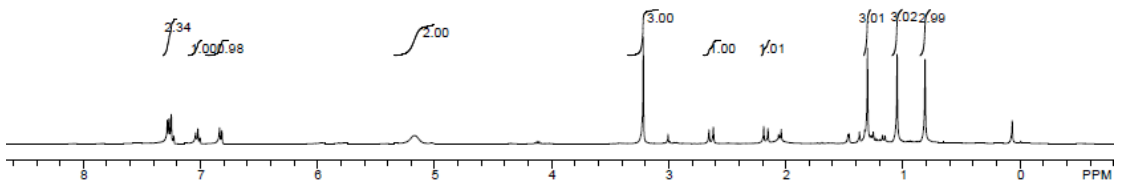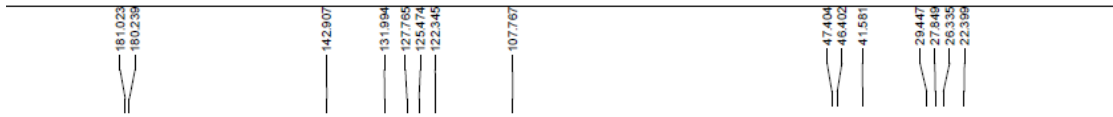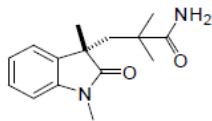

4

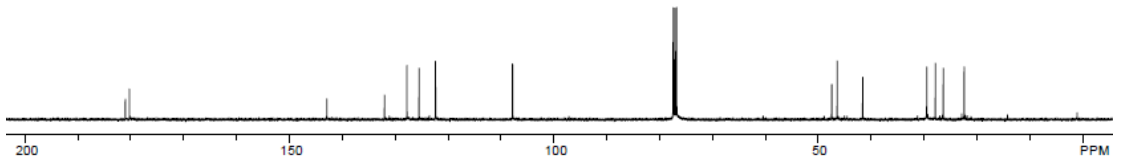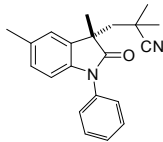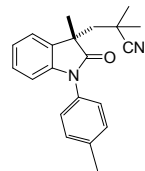

3k + 3k'

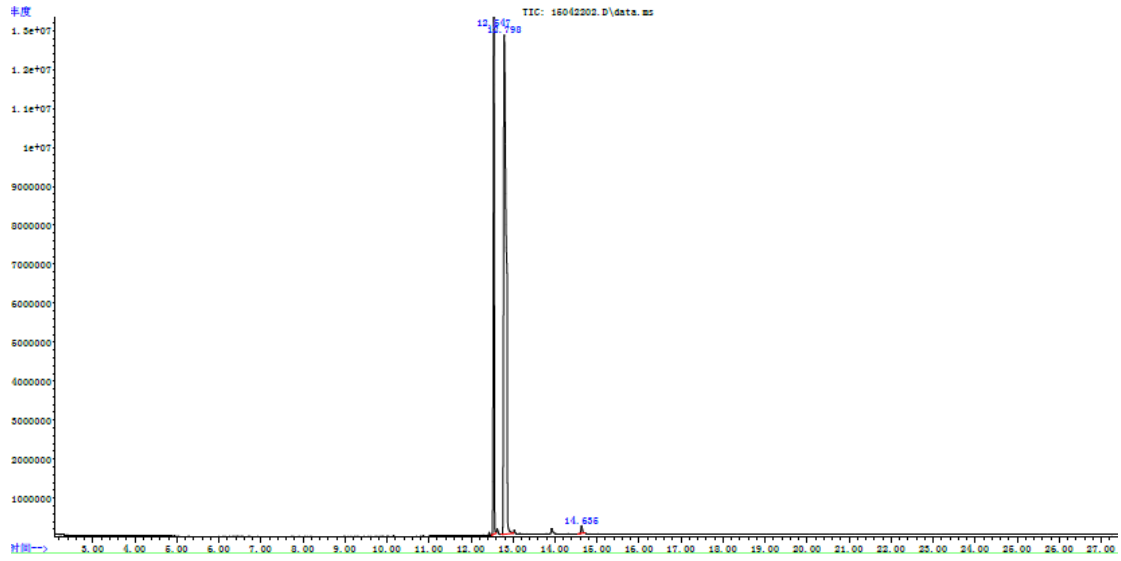

|   |        |      |      |      |    |          |           |         |         |
|---|--------|------|------|------|----|----------|-----------|---------|---------|
| 1 | 12.547 | 1195 | 1202 | 1208 | BV | 13069336 | 198649318 | 36.29%  | 26.481% |
| 2 | 12.798 | 1223 | 1231 | 1255 | BV | 12843057 | 547413181 | 100.00% | 72.973% |
| 3 | 14.635 | 1430 | 1442 | 1448 | BV | 195493   | 4099055   | 0.75%   | 0.546%  |
